# Supplementary material for: Identification of Proteins and Genes Expressed by Methylophaga thiooxydans During Growth on Dimethylsulfide and Their Presence in Other Members of the Genus
Source: Front Microbiol. 2019 May 29;10:1132. doi: 10.3389/fmicb.2019.01132 (PMC6548844; doi:10.3389/fmicb.2019.01132)
Supplement: Table S2 — List of query protein sequences used for genome comparison. [file Table_2.XLSX]

## Sheet: Supplementary Table S2
Supplementary Table S2 List of query protein sequences used for genome comparison
Protein	Gene	Accession number (NCBI/ UniProtKB)
DMS degradation
Dimethylsulfide dehydrogenase	ddh	WP_100687598, AAN46632.1/ Q8GPG4
Dimethylsulfide monooxygenase	dmoA	ADU77278/ E9JFX9
Methanethiol oxidase	mtoX
C1 metabolism
Methanol dehydrogenase-like protein	xoxF	ACS40517/ P29968
Methanol dehydrogenase subunit 1	mxaF	P16027/ P16027
Formaldehyde-activating enzyme	fae	KGJ23184/ Q46DY5
GSH-dependent formaldehyde-activating enzyme	gfa	NP_772856.1/ Q51669
GSH-dependent formaldehyde dehydrogenase	adhI	P72324
S-formyl glutathione hydrolase	fghA	A1AXZ2
Formyl-H4F deformylase	purU	WP_028029509/ P37051
Formate-H4F ligase	fhs/ftfL	Q83WS0/ Q83WS0
Formylmethanofuran dehydrogenase	fmdA, fmdB, fmdC	CAF30065, CAF30067, CAF30066/ Q48943
Formylmethanofuran-H4MPT-N-formyltransferase	ftr	AKJ40646/ Q49610
Methenyl-H4F cyclohydrolase	fchA	Q49135/ Q49135
Methenyl-H4MPT cyclohydrolase	mchA	Q8KMJ5/ Q8KMJ5
Methylene-H4F dehydrogenase	mtdA	CAD13312/ P55818
Methylene-H4F dehydrogenase/ cyclohydrolase	folD	KNX40634/ P24186
Methylene-H4MTP dehydrogenase	mtdB	CAD13313/ O85012
Formate dehydrogenase	fdh	WP_054303846/ P07658
Sulfur metabolism
Adenylylsulfate reductase, α-subunit	aprA	ZP_24024142, YP_001395188/ T2G6Z9
Adenylylsulfate reductase, β-subunit	aprB	YP_001218951, YP_007494196/ T2G899
Putative adenylylsulfate reductase membrane anchor	aprM	AAK16200, BAF61226/ Q9RB52
Sulfite reductase, dissimilatory-type α-subunit	dsrA	O33998, Q59109/ O33998
Sulfite reductase, dissimilatory-type β-subunit	dsrB	D3RSN2, Q59110/ Q59110
Sulfite reductase, dissimilatory-type γ-subunit	dsrC	E8N146, Q8K5F4/ Q8K5F4
Sulfite reductase, dissimilatory-type δ-subunit	dsrD	ZP_24023420, YP_002605458/ P70742
Intracellular sulfur oxidation protein	dsrE	YP_113793, YP_001140223/ O87896
Sulfide dehydrogenase, cytochrome subunit	fccA	NP_662955, AAA23316/ Q06529
Sulfide dehydrogenase (flavocytochrome c) flavoprotein chain	fccB	YP_001534133, AFN64730/ Q06530
Quinone-interacting membrane bound oxidoreductase	qmoA	YP_002601729, AAO46097/ M1WWB3
Quinone-interacting membrane bound oxidoreductase	qmoB	YP_002601728, YP_006759317/ C8X4M5
Quinone-interacting membrane bound oxidoreductase	qmoC	YP_002601727, YP_006759316/ K0NI10
Bifunctional sulfate adenylyltransferase/ adenylylsulfate kinase protein	cysN/ cysC	YP_771847, YP_166153/ O50274
SCO1/SenC family protein/methylamine utilization protein MauG	sco1/ mauG	ZP_01626817, YP_918493/ Q49128
Sulfur oxidation protein SoxA	soxA	YP_003444122, ZP_05128256/ Q1W3E4
Sulfur oxidation protein SoxB	soxB	YP_003444120, ZP_05128258/ Q9AGP3
Sulfur oxidation molybdopterin protein SoxC	soxC	YP_005079896, YP_166250/ Q89PG4
Sulfur oxidation protein SoxD	soxD	L0NGY6
Sulfur oxidation F protein	soxF	YP_006814879, YP_166253/ D8NLC8
Sulfur oxidation protein SoxG	soxG	CAH59726, CAD33968
Sulfur oxidation protein, metal-dependent hydrolase SoxH	soxH	EHP29685, CAD33969
Redox-sensitive transcriptional regulator SoxR	soxR	AAO11780, CAH59728
Sulfur oxidation protein SoxS	soxS	AAO11779, CAH59729
Sulfur oxidation protein SoxV	soxV	CAH59730, ZP_08629023
Thioredoxin SoxW	soxW	YP_681829, YP_003066444/ Q5LUR1
Sulfur oxidation protein SoxX	soxX	ADC63089, ZP_05128253/ Q5LUR0
Sulfur oxidation protein SoxY	soxY	YP_005640961, ZP_05128254
Sulfur oxidation protein SoxZ	soxZ	YP_001531819, ZP_05128255/ A0A089NU96
Sulfide quinone reductase (SqrA - Type I)	sqrA	AEN94583/ G0L3L6
Sulfide quinone reductase (SqrB - Type II)	sqrB	A0A1Q1N6G2
Heterodisulfide reductase-like sulfur oxidizing system (4Fe-4S dicluster domain-containing protein)	hdrC1	WP_041921823
Heterodisulfide reductase-like sulfur oxidizing system (subunit B)	hdrB1	WP_041921824
Heterodisulfide reductase-like sulfur oxidizing system (subunit A)	hdrA	WP_013214728
Heterodisulfide reductase-like sulfur oxidizing system (hypothetical protein)	hyp	WP_041921516
Heterodisulfide reductase-like sulfur oxidizing system (subunit C)	hdrC2	WP_041921825
Heterodisulfide reductase-like sulfur oxidizing system (disulfide reductase)	hdrB2	WP_041921826
Thiosulfate dehydrogenase	tsdA	RVX33978/ D3RVD4
Thiosulfate quinone oxidoreductase	doxDA	SMH65704/ P97207, P97224
Persulfide dioxygenase	pdo	PRJEB24175
Octaheme tetrathionate reductase	otr	AAN57117/ Q8E9W8
Sulfite dehydrogenase	soeABC	D3RNN8, D3RNN7, D3RNN6
Molybdenum-containing sulfite:cytochrome c oxidoreductase SorAB	sorAB	A0A345J5L7, A0A347TKS9
