# Supplementary material for: Identification of Proteins and Genes Expressed by Methylophaga thiooxydans During Growth on Dimethylsulfide and Their Presence in Other Members of the Genus
Source: Front Microbiol. 2019 May 29;10:1132. doi: 10.3389/fmicb.2019.01132 (PMC6548844; doi:10.3389/fmicb.2019.01132)
Supplement: Table S3 — Summary of protein fractions extracted from Methylophaga thiooxydans DMS010 grown in triplicates on either methanol or DMS. [file Table_3.XLSX]

## Sheet: Supplementary Table S3
Supplementary Table S3 Summary of protein fractions extracted from Methylophaga thiooxydans DMS010 grown in triplicates on either methanol or DMS.
Sample	Absorbance (Bradford)	Protein conc. [mg/mL]	Amount of protein [mL]
Soluble protein fraction
1) M. thiooxydans + methanol (1)	0.210 (5× diluted)	0.75	~ 4.0 mL
2) M. thiooxydans + methanol (2)	0.220 (5× diluted)	0.8	~ 4.0 mL
3) M. thiooxydans + methanol (3)	0.221 (5× diluted)	0.8	~ 4.0 mL
4) M. thiooxydans + DMS (1)	0.308	0.24	~ 4.1 mL
5) M. thiooxydans + DMS (2)	0.323	0.26	~ 4.2 mL
6) M. thiooxydans + DMS (3)	0.28	0.22	~ 4.3 mL
Membrane protein fraction
1) M. thiooxydans + methanol (1)	1.58	> 1mg/mL	~ 0.5 mL
2) M. thiooxydans + methanol (2)	1.27	> 1mg/mL	~ 0.5 mL
3) M. thiooxydans + methanol (3)	1.57	> 1mg/mL	~ 0.5 mL
4) M. thiooxydans + DMS (1)	1.224	> 1mg/mL	~ 0.5 mL
5) M. thiooxydans + DMS (2)	1.257	> 1mg/mL	~ 0.5 mL
6) M. thiooxydans + DMS (3)	1.245	> 1mg/mL	~ 0.5 mL
