# Supplementary material for: Identification of Proteins and Genes Expressed by Methylophaga thiooxydans During Growth on Dimethylsulfide and Their Presence in Other Members of the Genus
Source: Front Microbiol. 2019 May 29;10:1132. doi: 10.3389/fmicb.2019.01132 (PMC6548844; doi:10.3389/fmicb.2019.01132)
Supplement: Table S6 — Comparison of transcript expression (mRNA) of Methylophaga thiooxydans DMS010 grown on methanol or DMS. Rockhopper calculates one expression level for each treatment (DMS/methanol) and each transcript from the triplicate RNA sequencing results as explained in the text above. [file Table_6.XLSX]

## Sheet: Supplementary Table S6
Supplementary Table S6 Comparison of transcript expression (mRNA) of Methylophaga thiooxydans DMS010 grown on methanol or DMS
Locus_tag (MDMS009_#)	Gene	Functional annotation	Strand	Expression DMS	Expression MeOH
MeSH degradation (MeSH --> Formaldehyde + H2S + H2O2; H2O2 --> O2 + H2O)
768	mtoX	Methanethiol oxidase	+	17350	37
211	mtoX	Methanethiol oxidase	-	4064	20
51	ccpA	Cytochrome c551 peroxidase (SCO1/MauG)	+	1428	15
908	ccpA	Cytochrome c551 peroxidase (SCO1/MauG)	-	1543	16
2469	katG_2	Catalase/peroxidase	+	81	16
1525	katG_1	Catalase/peroxidase	-	167	51
RuMP cycle
509	hxlA	3-hexulose-6-phosphate synthase	-	3263	7840
475	hxlB	6-phospho-3-hexuloisomerase	-	1678	3662
1331	fba	Fructose-bisphosphate aldolase	-	97	79
1532	fbp_1	Fructose-1,6-bisphosphatase	+	64	44
866	tkt	Transketolase (EC 2.2.1.1)	-	167	859
KEGG category: One carbon pool by folate (CH3-H4F --> Formate)
515	metF	Methylenetetrahydrofolate reductase	-	38	41
1467	MTHFD1	Methylenetetrahydrofolate dehydrogenase	+	30	69
1028	fhs	Formate--tetrahydrofolate ligase	+	72	81
888	purU	Formyltetrahydrofolate deformylase	+	51	47
KEGG category: Methane metabolism (Formaldehyde --> CO2)
73	fae_1	Formaldehyde activating enzyme	+	246	302
1418	mtdB	Methylene tetrahydromethanopterin dehydrogenase	+	86	130
650	mch	Methenyltetrahydromethanopterin cyclohydrolase	-	49	100
1442	fhcD	Formyltransferase/hydrolase complex	+	78	158
1429	fhcA	Formyltransferase/hydrolase complex subunit A	+	65	159
1334	fhcB	Formyltransferase/hydrolase complex subunit B	+	66	147
1520	fhcC	Formyltransferase/hydrolase complex (tungsten) subunit C	+	87	157
2131	fdh (1)	Formate dehydrogenase-O, major subunit	+	260	174
2239	fdh (2)	Formate dehydrogenase-O, iron-sulfur subunit	+	165	140
2257	fdh (3)	Formate dehydrogenase, alpha subunit	+	117	74
1738	fdh (4)	Formate dehydrogenase O gamma subunit	+	116	117
Sulfur metabolism
2035	fccB	Sulfide dehydrogenase [flavocytochrome C]	+	68	56
742	soxC	Sulfur oxidation molybdopterin C protein	-	57	37
744	soxD	Sulfite dehydrogenase cytochrome subunit SoxD	-	74	37
2042	soxY	Sulfur oxidation protein SoxY	+	117	46
2129	soxZ	Sulfur oxidation protein SoxZ	+	128	61
1479	soxH	SoxH protein	+	157	51
261	sulP	Putative sulfate permease	+	55	78
1953	cysE	Serine O-acetyltransferase	-	139	12
2498	cysH	Phosphoadenylyl-sulfate reductase (PAPS)	+	68	194
500	cysK	Cysteine synthase	-	159	97
1966	sqrA	Sulfide:quinone reductase	+	388	11
284	pdo	Rhodanese-PDO fusion	+	1097	17
Central carbon metabolism
1530	gap	Glyceraldehyde-3-phosphate dehydrogenase	-	134	197
1444	pgk	Phosphoglycerate kinase	-	115	103
1509	qpmI	Phosphoglycerate mutase	+	63	66
2024	eno	Enolase	+	46	154
1439	pyk	Pyruvate kinase	-	72	49
2858	pdha1	Pyruvate dehydrogenase	+	90	163
2903	dlat	Dihydrolipoamide S-acetyltransferase	+	67	132
198	acsA	Acetyl-coenzyme A synthetase	-	113	77
153	aldh	Aldehyde dehydrogenase	+	78	87
445	pgi	Glucose-6-phosphate isomerase	-	103	186
Lipopolysachharide biosynthesis
3024	lpxA	Acyl-UDP-N- acetylglucosamine O-acyltransferase	-	95	180
3002	lpxD	UDP-3-O-glucosamine N-acyltransferase	-	94	250
2938	lpxH	UDP-2,3-diacylglucosamine diphosphatase	+	62	63
2306	lpxB	Lipid-A-disaccharide synthase	-	34	44
2124	lpxK	Tetraacyldisaccharide 4'-kinase	-	41	52
745	kdtA	Lipid A 3-deoxy-D-manno-octulosonic acid transf.	-	33	23
754	htrB	Lipid A biosynthesis lauroyl acyltransferase	+	54	34
1914	kdsA	2Keto-3deoxy-D-manno-octulosonate-8-P synthase	+	54	95
410	kdsC	3deoxy-D-manno-octulosonate 8-P phosphatase	+	68	56
Folate biosynthesis
189	folE1	GTP cyclohydrolase I	+	31	13
959	folE1	GTP cyclohydrolase I	-	374	239
312	folA (+)	Dihydrofolate reductase	+	20	17
1507	folA (-)	Dihydrofolate reductase	-	98	145
1335	folB	Dihydroneopterin aldolase	+	45	56
1605	folM	Alternative dihydrofolate reductase 1	-	82	87
1726	folP	Dihydropteroate synthase	+	79	91
2375	folK	2-amino-4-hydroxy-6-hydroxymethyldihydropteridine pyrophosphokinase	+	48	65
Additional highly expressed transcripts (DMS)
1988		Hypothetical protein	+	163379	96613
2270	cirA	Outer membrane receptor, mostly Fe transport	+	6467	1296
2670		Hypothetical protein	+	5162	768
n.a. (1)		Hypothetical protein	+	2348	15
1767	xoxF	PQQ-dependent dehydrogenase	+	2199	121
2058	xoxF	PQQ-dependent dehydrogenase	+	1533	380
2687	pazS	Pseudoazurin	+	1986	129
906		Membrane prot., aromatic hydrocarbon degradation	+	1469	18
226		Fatty acid desaturase domain protein	-	1359	10
928		Type I secretion sys., outer membrane LapE AggA	+	1332	747
120	cysB	Cys regulon transcriptional activator CysB	+	669	11
61		Oxidoreductase, NAD-binding domain	-	618	12
199	glbN	Cyanoglobin; Hemoglobin-like protein HbN	-	601	21
153	aldh	Aldehyde dehydrogenase	-	549	98
2702	thiC	Thiamine biosynthesis protein	+	467	17
140		Cytochrome oxidase biogenesis, Sco1/SenC/PrrC	+	454	12
1752	pqqE	Coenzyme PQQ synthesis protein E	+	436	126
1782	pqqD	Coenzyme PQQ synthesis protein D	+	351	93
862		Metallo-beta-lactamase family protein	+	293	16
2015	pqqB	Coenzyme PQQ synthesis protein B	+	170	64
809	dld	Dihydrolipoamide dehydrogenase	+	1007	15
Highly expressed transcripts (methanol)
1502	mxaF	Methanol dehydrogenase large subunit protein	+	823	12390
1410	mxaI	Methanol dehydrogenase, small subunit	+	1414	27101
1970	hupB	DNA-binding protein HU-beta	+	1179	5544
1581	moxG	Cytochrome c-L precursor	+	267	3959
1614	mxaJ	MxaJ, protein involved in methanol oxidation	+	275	3801
37	mxaD	MxaD protein	+	68	965
1199	asbA	Anthrachelin biosynthesis protein	+	15	518
1192		Acyl carrier protein, anthrachelin biosynthesis	+	19	500
1140		Protein GBAA1985, anthrachelin biosynthesis	+	18	402
1204	asbB	Anthrachelin biosynthesis protein	+	13	346
1128		Long-chain-fatty-acid-CoA ligase, anthrachelin	+	17	341
1147		Protein GBAA1986, anthrachelin biosynthesis	+	13	308
(1) not annotated previously; location: GG657900.1_36016_36387, strand: +; translation start: 2227270; translation stop: 2227818
